# Supplementary material
Source: PubMed Central journal article supplement (PMC4733535)
Supplement: NIHMS728703-supplement-01.pdf [file NIHMS728703-supplement-01.pdf]

Supplemental Figure 1: Human patients with OSA have increased expression of OCy markers. Heat maps from the Kobayashi (A), Baird (B), and Henderson (C) ONCOMINE data sets. Not all genes queried were present in all data sets.

# Supplemental Figure 1

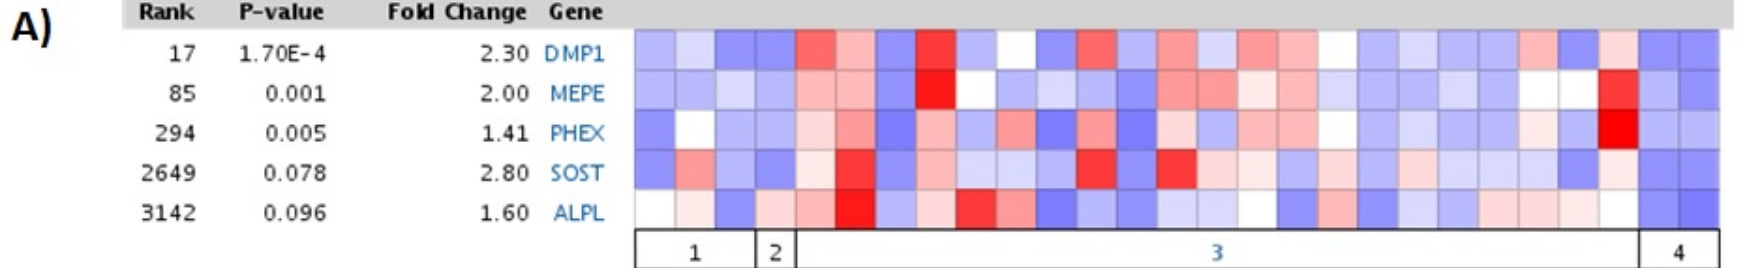

1. Chondroblastic Osteosarcoma (3) 2. Fibroblastic Osteosarcoma (1) 3. Osteoblastic Osteosarcoma (21) 4. Telangiectatic Osteosarcoma (2)

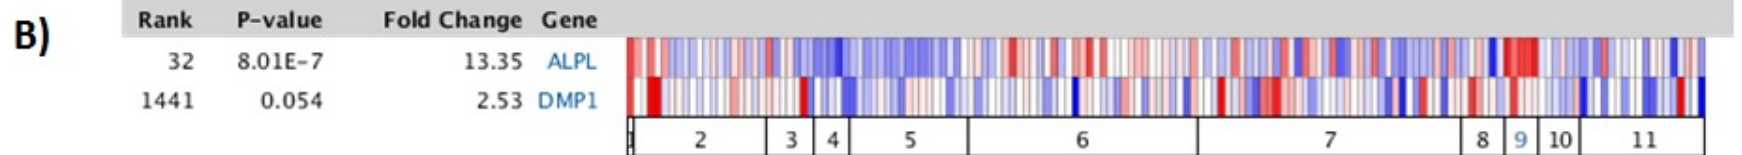

1. Chondrosarcoma (1) 2. Ewing's Sarcoma (19) 3. Fibrosarcoma (7) 4. Gastrointestinal Stromal Tumor (5) 5. Leiomyosarcoma (17)  
6. Liposarcoma (33) 7. Malignant Fibrous Histiocytoma (38) 8. Malignant Peripheral Nerve Sheath Tumor (6) 9. Osteosarcoma (5)  
10. Rhabdomyosarcoma (6) 11. Soft Tissue Sarcoma (18)

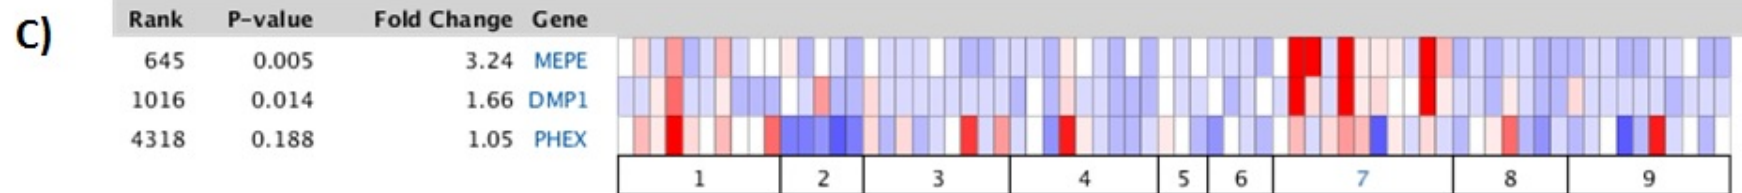

1. Chondrosarcoma (10) 2. Ewing's Sarcoma (5) 3. Leiomyosarcoma (9) 4. Liposarcoma (9) 5. Malignant Fibrous Histiocytoma (3)  
6. Malignant Peripheral Nerve Sheath Tumor (4) 7. Osteosarcoma (11) 8. Rhabdomyosarcoma (7) 9. Soft Tissue Sarcoma (10)

Least Expressed

Most Expressed

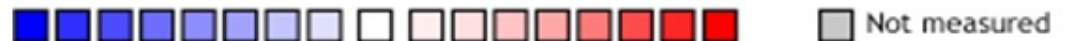

Note: Colors are z-score normalized to depict relative values within rows. They cannot be used to compare values between rows.
